# Supplementary material for: Structural controls of AuNR@mSiO2: tuning of the SPR, and manipulation of the silica shell thickness and structure
Source: Royal Society of Chemistry journal article supplement (doi:10.1039/c6tc00023a), 2016-01-01
Supplement: c6tc00023a1.pdf [file c6tc00023a1.pdf]

Electronic Supplementary Information for:

## Structural Controls of AuNR@mSiO<sub>2</sub>: Tuning of the SPR, and Manipulations of the Silica Shell Thickness and Structure

Zihua Wu, Qiang Zeng\*, Haishui Wang\*

School of Chemistry and Chemical Engineering, South China University of Technology, Guangzhou 510641, P. R. China

\*To whom correspondence should be addressed. E-mail: ceqzeng@scut.edu.cn, wanghsh@scut.edu.cn

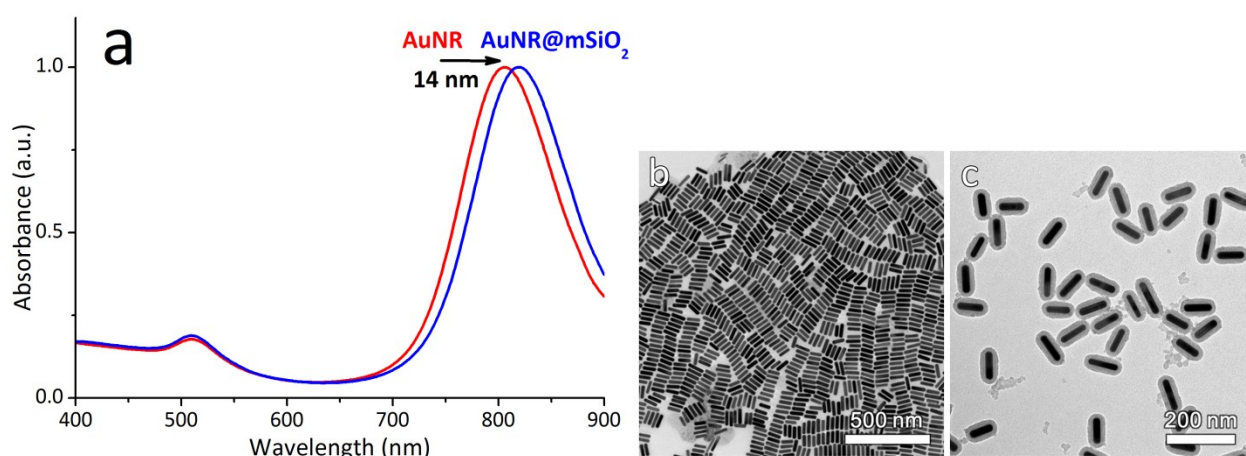

**Fig. S1** (a) Normalized UV-vis spectra of the prepared AuNRs and AuNR@mSiO<sub>2</sub>. (b, c) TEM images of the corresponding AuNRs and AuNR@mSiO<sub>2</sub>.

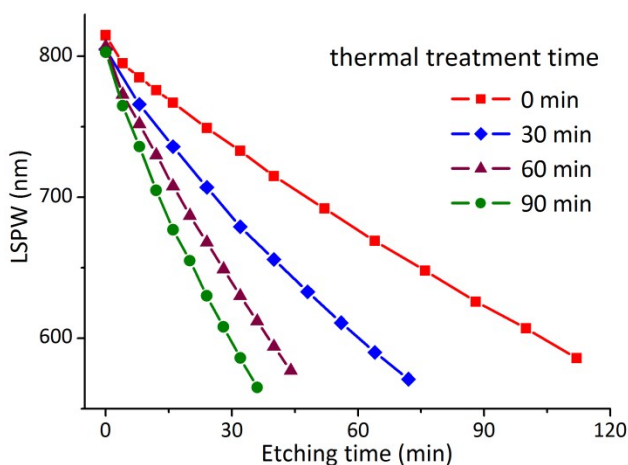

**Fig. S2** Influences of different time of thermal treatment in ethanol-water solution on etching-caused LSPW changes of AuNR@mSiO<sub>2</sub>.

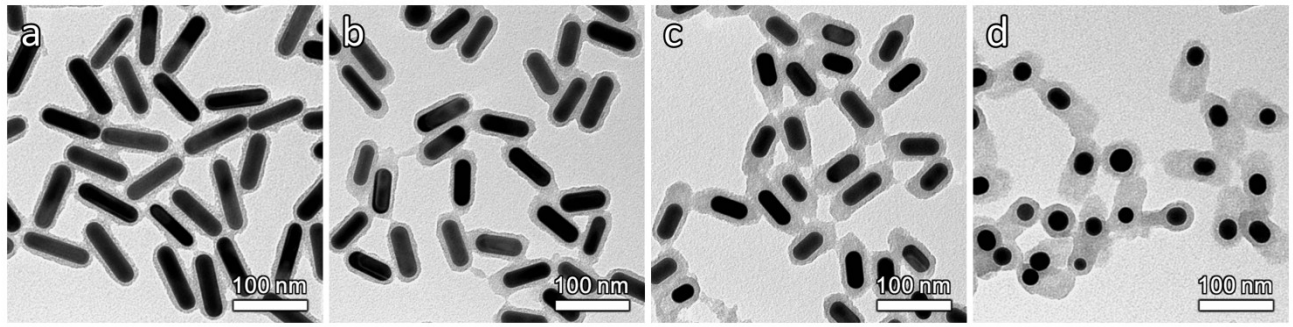

**Fig. S3** TEM images of AuNR@mSiO<sub>2</sub> in ethanol-water solution with the different etching time. The etching time and silica shell thicknesses at side of AuNRs were: (a) 0 min,  $8.1 \pm 0.9$  nm, (b) 24 min,  $8.0 \pm 0.6$  nm, (c) 56 min,  $8.6 \pm 0.9$  nm, and (d) 96 min,  $9.8 \pm 1.1$  nm, respectively.
